# Supplementary material for: Methodology of the third British National Survey of Sexual Attitudes and Lifestyles (Natsal-3)
Source: Sex Transm Infect. 2013 Nov 26;90(2):84–9. doi: 10.1136/sextrans-2013-051359 (PMC3933071; doi:10.1136/sextrans-2013-051359)
Supplement: Web supplement [file sextrans-2013-051359-s1.pdf]

### Natsal-3 methodology: web only appendix

Fieldwork was split into eight ‘waves’, with each wave issued roughly every quarter over the two years allocated to data collection. Although the number of issued sectors varied per wave, since they were randomly selected, each wave provides a nationally representative sample of the general population. In order to meet the overall target of 15,000 achieved interviews, as well as the targets for individual age groups, the sample design was ‘fine tuned’ during the two year period of fieldwork. A summary of the number of PSUs and addresses issued per wave is found in Table A1.

**Web Table A1      Number of PSUs and addresses issued per wave of fieldwork by sample type**

|                                  | PSUs issued | Addresses/PSU |              |                 |                 |
|----------------------------------|-------------|---------------|--------------|-----------------|-----------------|
|                                  |             | Total         | Core (16-74) | Boost 1 (16-34) | Boost 2 (16-29) |
| Wave 1<br>Sep–Dec 2010           | 225         | 30            | 12           | 10              | 8               |
| Wave 2<br>Jan–Mar 2011           | 235         | 30            | 12           | 10              | 8               |
| Wave 3<br>Apr–Jun 2011           | 217         | 36            | 15           | 11              | 10              |
| Wave 4<br>Jul–Sep 2011           | 217         | 36            | 15           | 11              | 10              |
| Wave 5<br>Oct–Dec 2011           | 217         | 36            | 15           | 11              | 10              |
| Wave 6<br>Jan–Mar 2012           | 217         | 36            | 15           | 11              | 10              |
| Wave 7<br>Mar–May 2012           | 217         | 36            | 16           | 11              | 9               |
| Wave 8<br>May–Aug 2012           | 182         | 36            | 16           | 11              | 9               |
| <b>TOTAL PSUs/<br/>addresses</b> | <b>1727</b> | <b>59412</b>  | <b>24924</b> | <b>18537</b>    | <b>15951</b>    |
